# Supplementary material for: Occurrence of urea-based soluble epoxide hydrolase inhibitors from the plants in the order Brassicales
Source: PLOS journal article supplement (doi:10.1371/journal.pone.0176571), 2017-05-04

Figure S2a.

$^1\text{H}$  NMR ( $\text{DMSO-}d_6$  with 0.03% v/v TMS, 600MHz)

Synthetic standard (compound **2**)

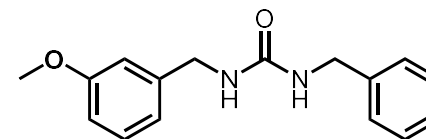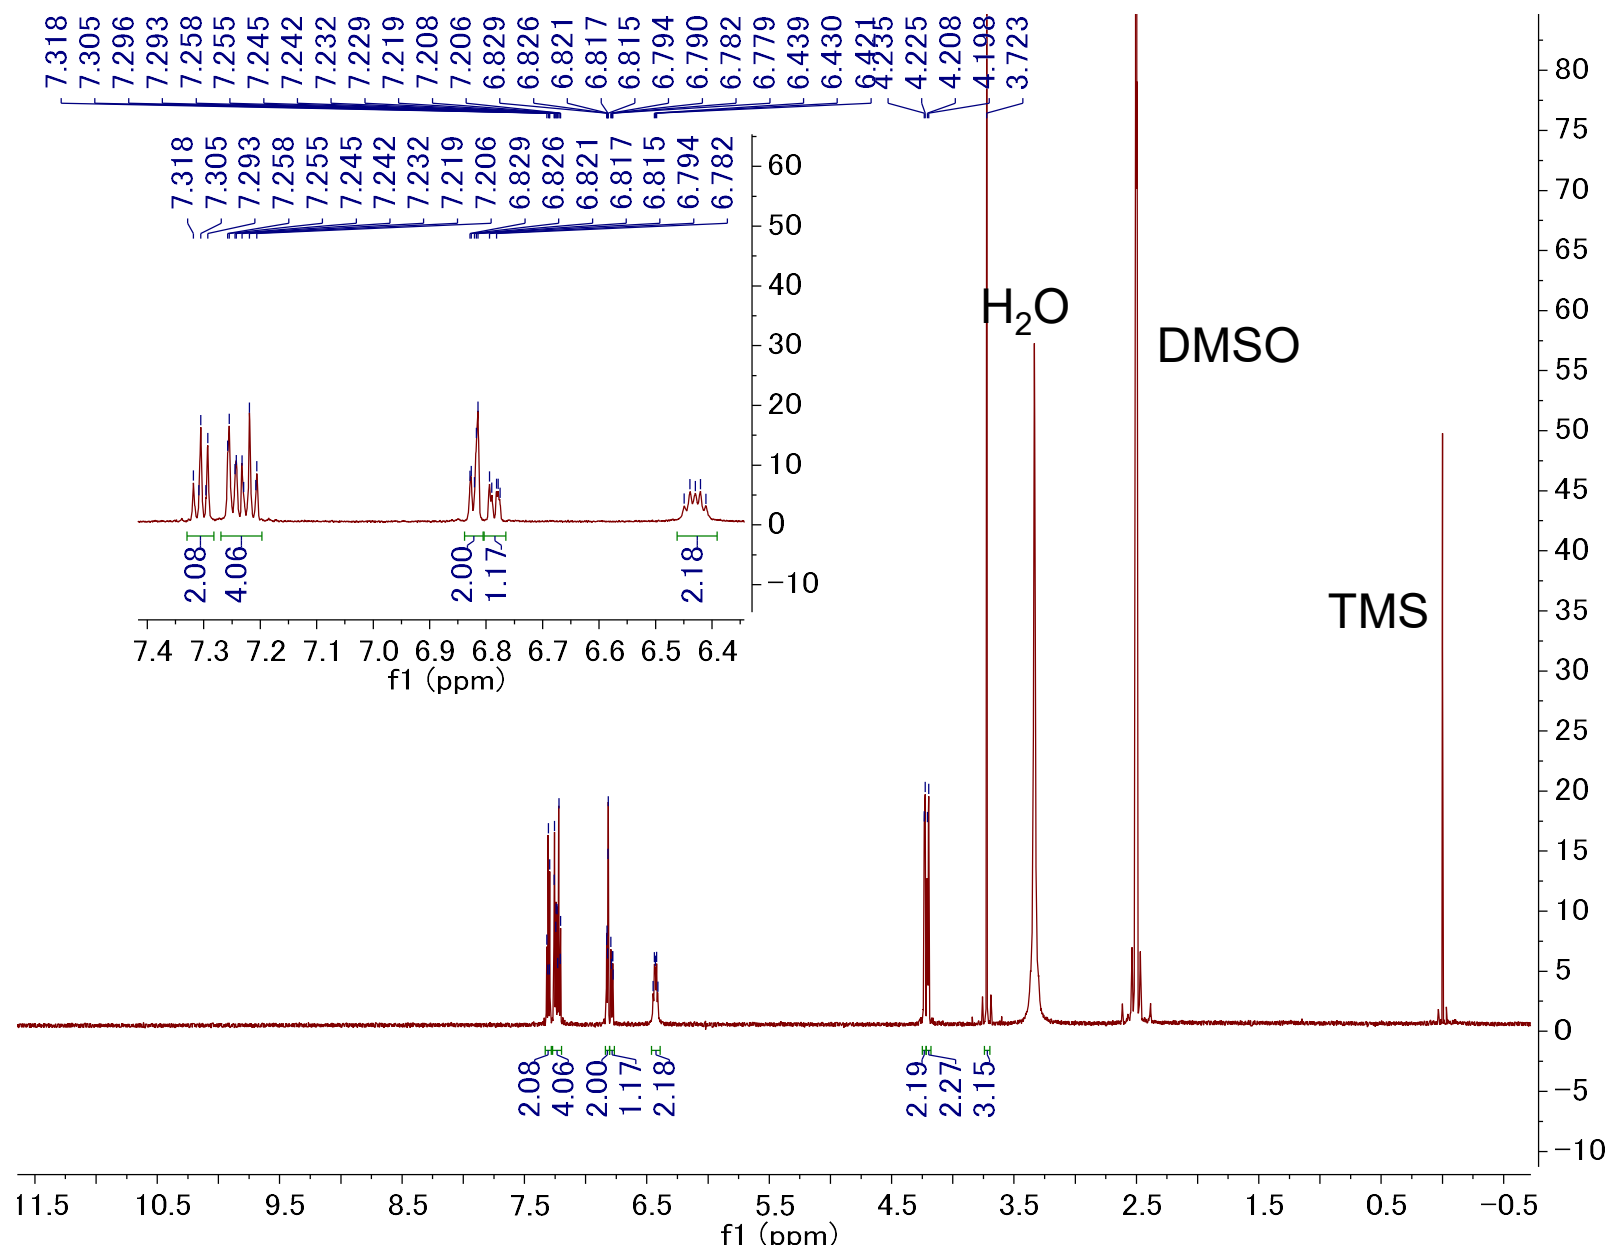

Figure S2b.

$^1\text{H}$  NMR ( $\text{DMSO-}d_6$  with 0.03% v/v TMS, 800MHz)

Compound **2** from maca root

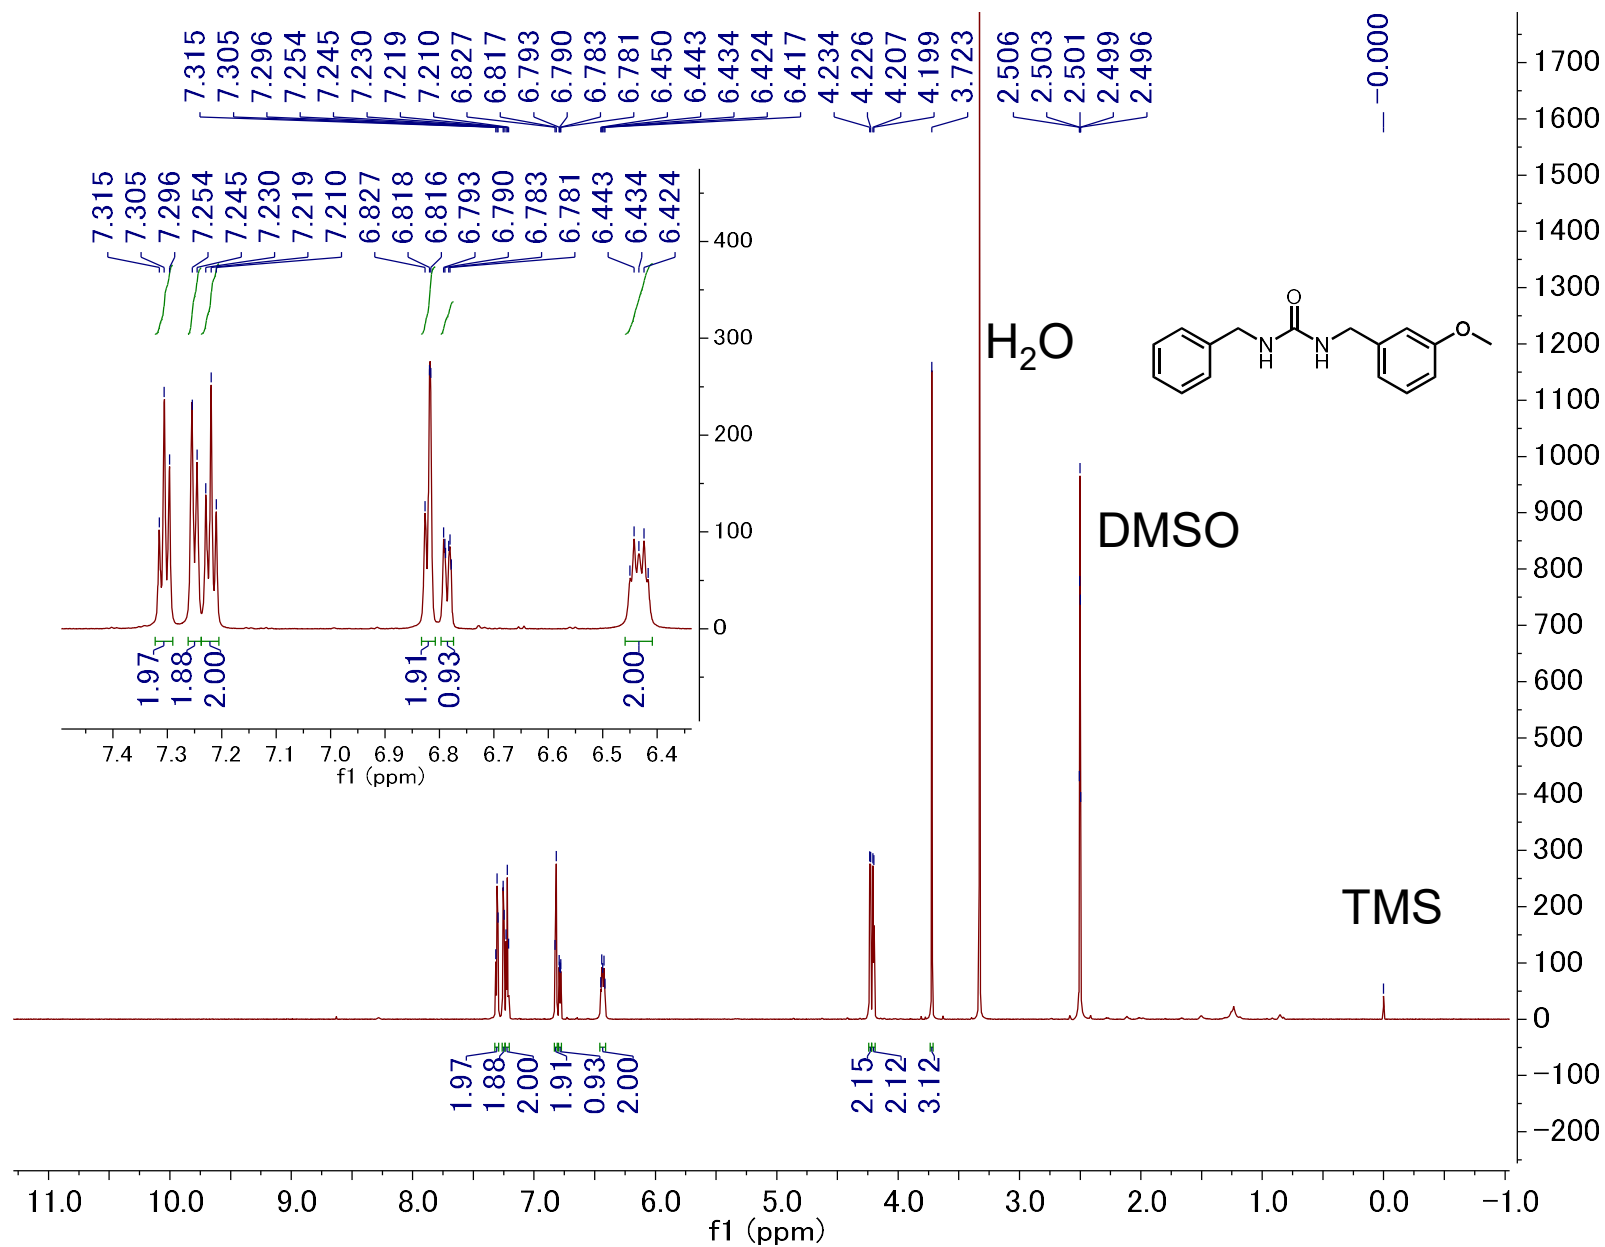

Figure S2c.  
 $^{13}\text{C}$  NMR (DMSO- $d_6$  with 0.03% v/v TMS, 201MHz)  
Compound **2** from maca root

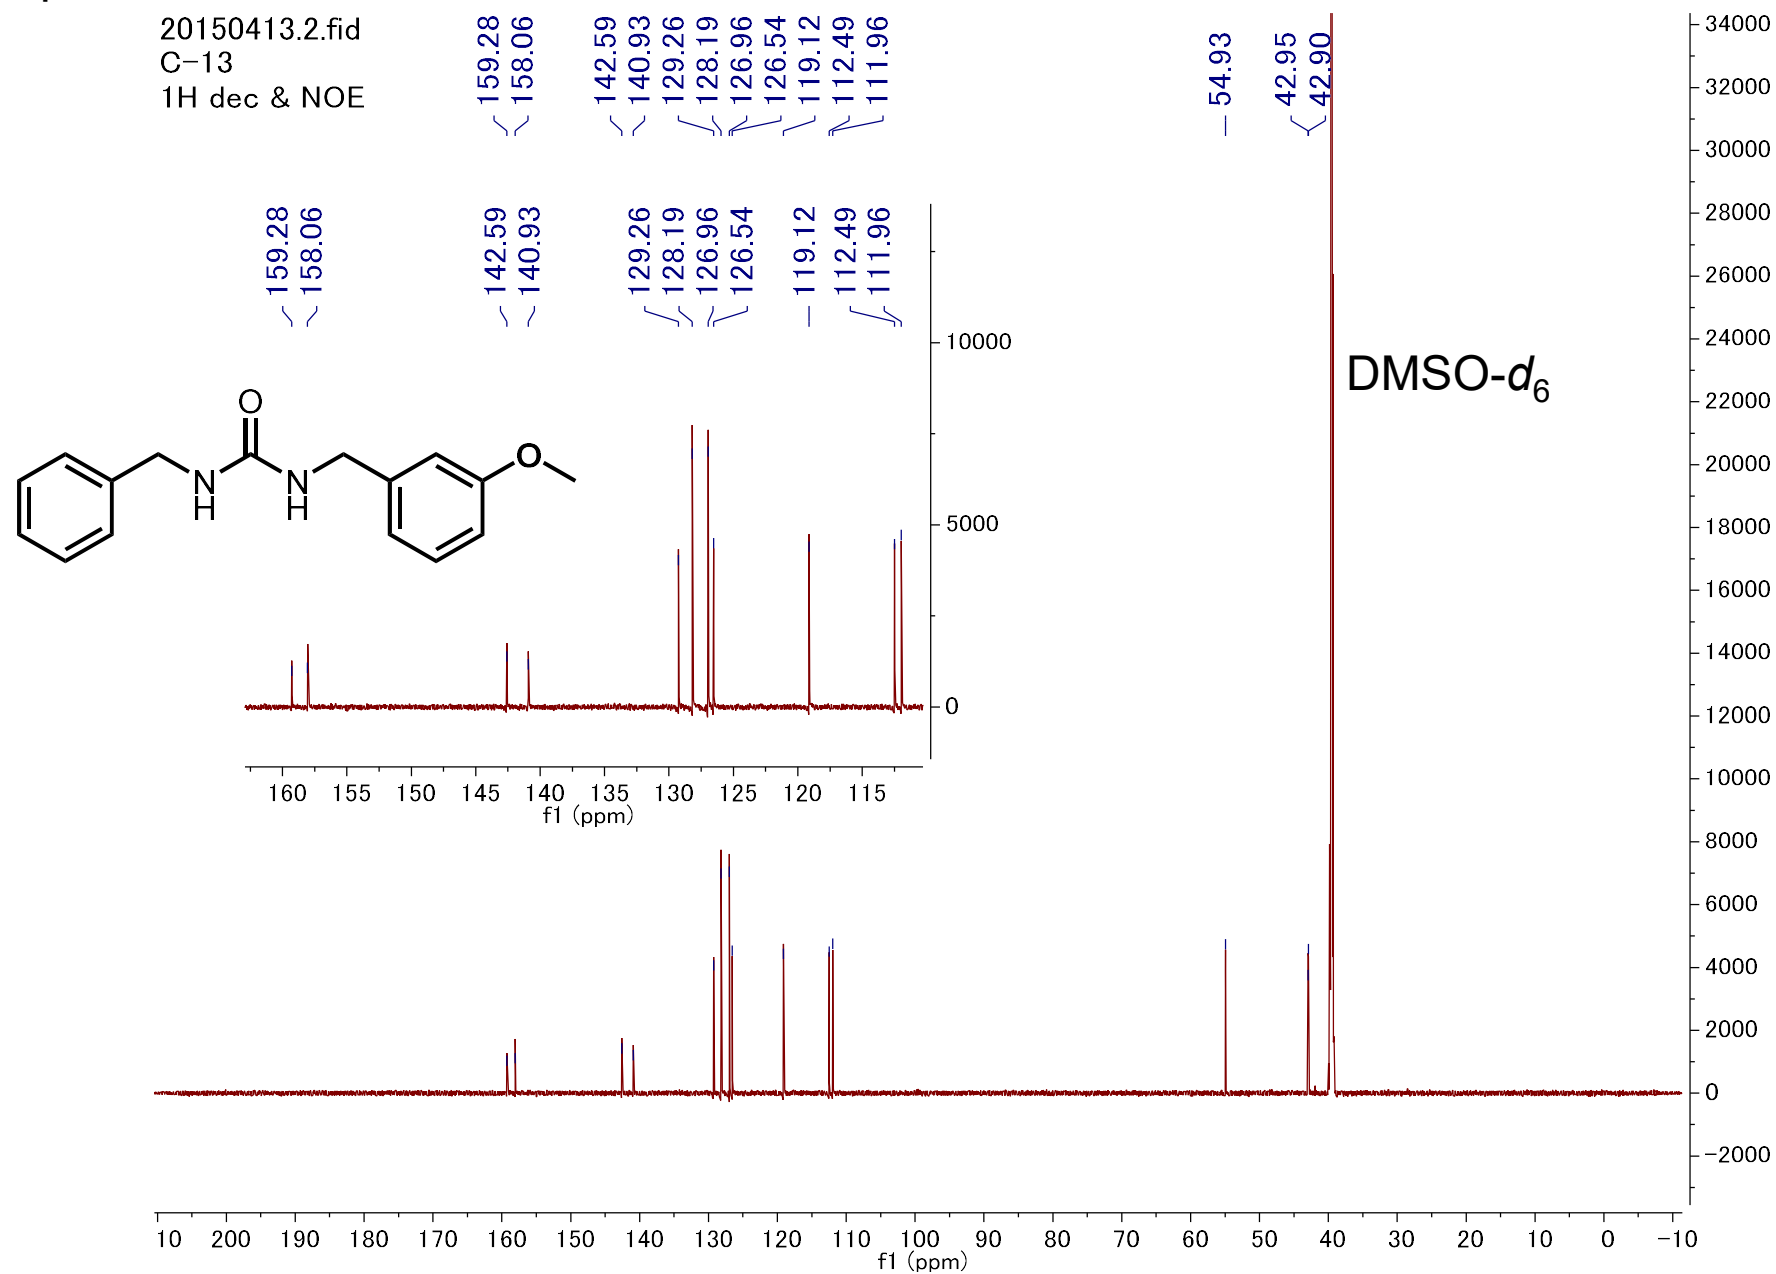

Supplement: S9 (10.1371/journal.pone.0176571.s009) [file journal.pone.0176571.s009]
